# Supplementary material
Source: PubMed Central journal article supplement (PMC4936027)
Supplement: rspb20160263supp1.pdf [file rspb20160263supp1.pdf]

# **Supplementary Materials for**

# **Do perceptual biases emerge early or late**

# **in visual processing?**

Decision-biases in motion perception

Elisa Zamboni<sup>1</sup>

Timothy Ledgeway<sup>1</sup>

Paul V McGraw<sup>1</sup>

Denis Schluppeck<sup>1,\*</sup>

<sup>1</sup>School of Psychology, University of Nottingham

University Park, Nottingham, NG7 2RD, UK

\*Corresponding author: Dr. Denis Schluppeck, School of Psychology, University of Nottingham, University Park, Nottingham, NG7 2RD, UK,

E-mail: [denis.schluppeck@nottingham.ac.uk](mailto:denis.schluppeck@nottingham.ac.uk)

Telephone: +44 (0)115 8468580

### *Supplementary Figure 1 — Behavioural results for fine discrimination task*

Psychometric curves for the fine discrimination task for all subjects. Each panel shows, for one subject, the proportion of clockwise (CW) responses as a function of the direction of motion of the stimuli relative to the reference (negative values, counter-clockwise directions; positive values clockwise directions). Different colours indicate data obtained at four different coherence levels (blue, 4 %; green, 7 %; yellow, 13 %; red, 25 %). For all subjects, performance improved with increasing coherence (red curves are steepest; blue curves are shallowest). To quantify this, we fitted cumulative Gaussian distributions (non-linear least squares, Nelder-Mead). The steepness of the psychometric curves, as quantified by the standard deviation ( $\sigma$ ) of the cumulative Gaussian distribution, is inversely related to thresholds. Because the discrimination task was identical for the *reference present* and *reference absent* conditions, we pooled data for these plots.

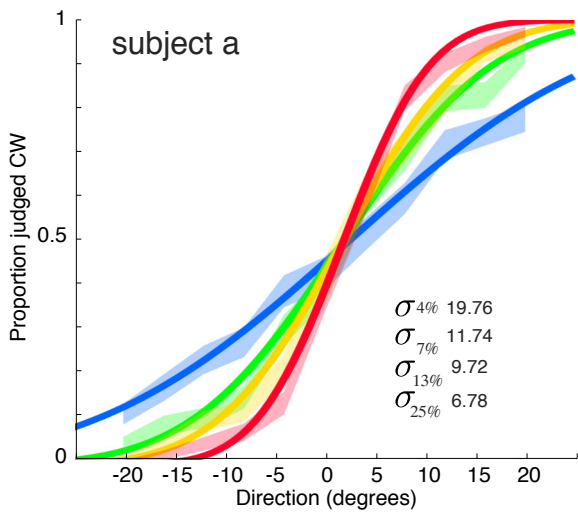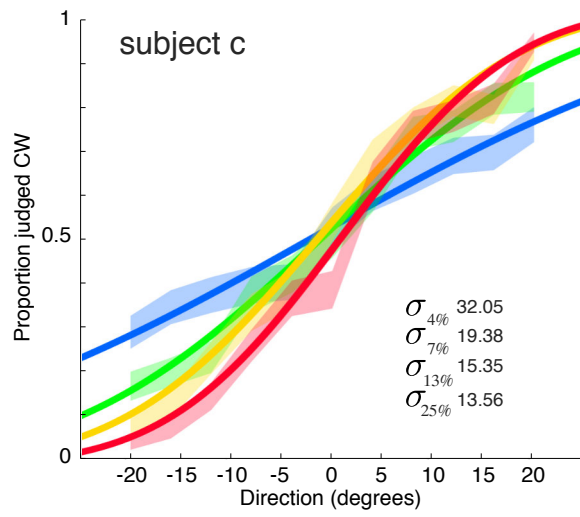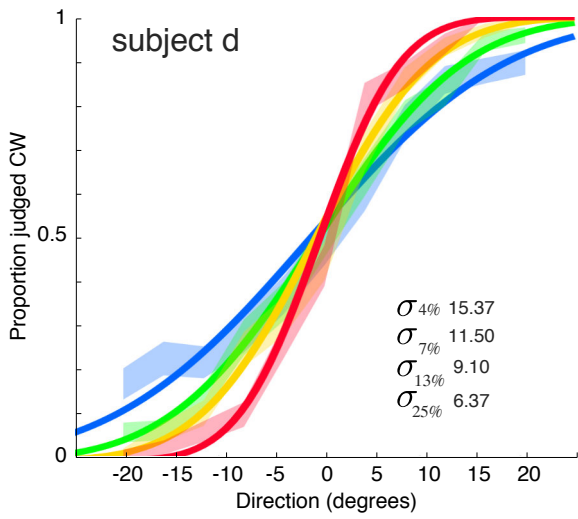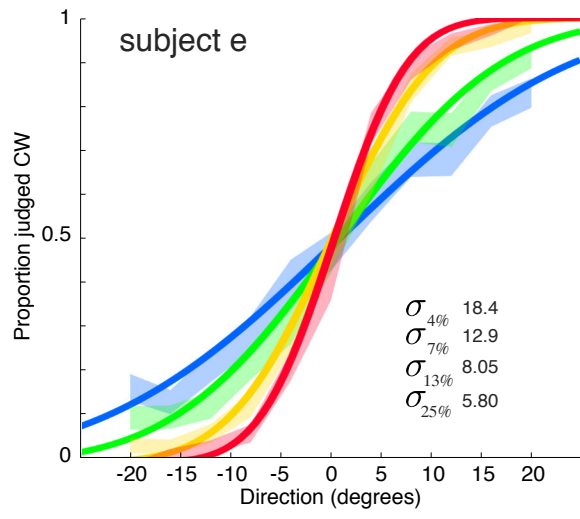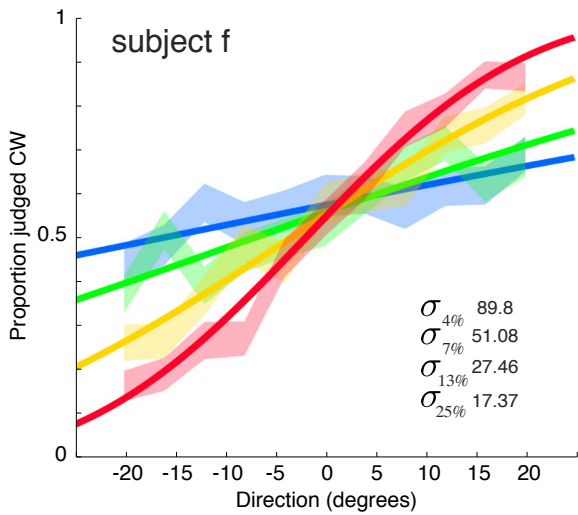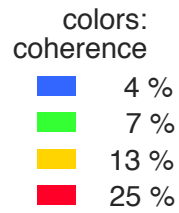

Figure 1

### *Supplementary Figure 2 — Behavioural results for estimation task*

Joint histograms showing percentage of direction estimates as function of (true) stimulus direction. Rows 1-5 show data from individual subjects for four different coherence levels and *reference present / reference absent* conditions. Row 6 shows the grand average across subjects. Grey scale images were derived as for Figure 2. Across all coherence levels, for all subjects, direction estimates were biased in the *reference present* condition. For the *reference absent* conditions, no consistent biases were apparent. To aid visualization, we marked the local maxima for the distribution of estimates for each stimulus direction (treating the joint histograms column-wise) with a red symbol. Regression lines through those points for reference absent data (red solid lines), indicate that responses were on average unbiased: across all conditions, they are close to the identity line (dashed white line). It is worth noting, that the slightly increased variability in the direction estimates of subjects c and f is also reflected in the psychometric curves for the fine discrimination task (see Supplementary Figure 1). This indicates poorer performance overall for those particular subjects.

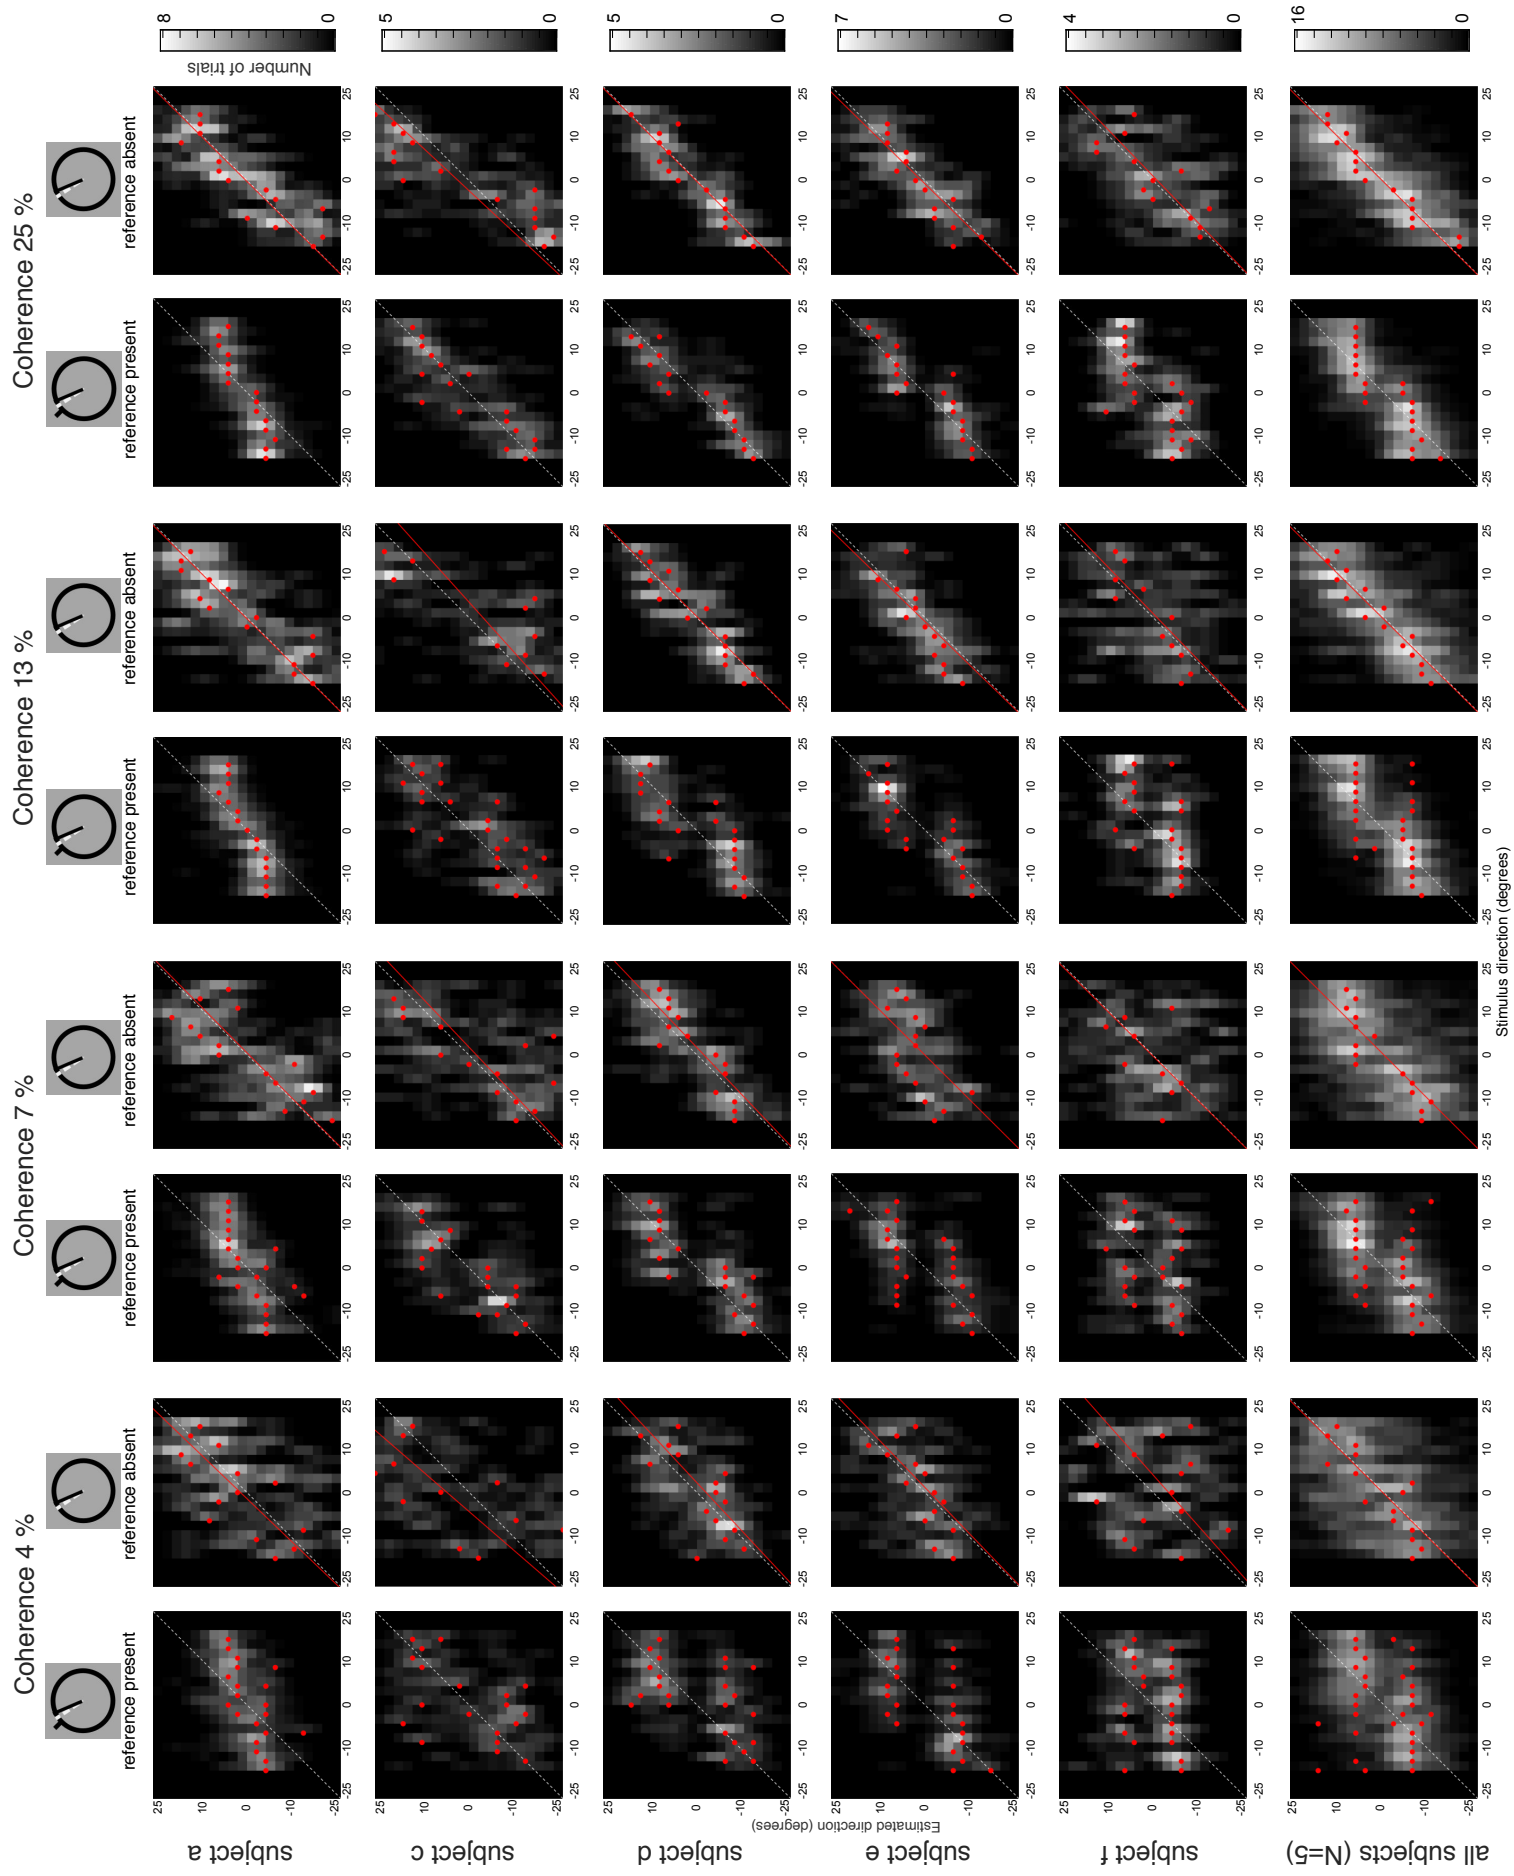

Figure 2
